# Supplementary material for: Transcriptome and chemical analyses revealed the mechanism of flower color formation in Rosa rugosa
Source: Front Plant Sci. 2022 Sep 23;13:1021521. doi: 10.3389/fpls.2022.1021521 (PMC9539313; doi:10.3389/fpls.2022.1021521)
Supplement: Supplementary file 3 [file Table_1.xlsx]

## Sheet: shee1
Supplementary Table 1 The classification and quantification results of detected anthocyanins.
NO.	Index	Compounds	MW	RT	Class	7-23_1	7-23_2	7-23_3	8-37_1	8-37_2	8-37_3	8-16_1	8-16_2	8-16_3	Notes
1	Anthocyanidin_07	Cyanidin-3-O-5-O-(6-O-coumaroyl)-diglucoside	757.198	11.8	Cyanidin	84.478	85.332	79.3103	0.60467	0.617922	0.642617	2.45905	2.54167	2.55578
2	Anthocyanidin_03	Cyanidin-3,5,3'-O-triglucoside	773.214	5.1	Cyanidin	0.469829	0.421606	0.425684	0.1685	0.17572	0.173928	1.83264	1.87401	1.82888
3	Anthocyanidin_05	Cyanidin-3-O-(6-O-malonyl-beta-D-glucoside)	535.109	10.27	Cyanidin	0.144482	0.140119	0.128359	N/A	N/A	N/A	N/A	N/A	N/A	＜1ug/g
4	Anthocyanidin_12	Cyanidin-3-O-rutinoside	595.166	8.19	Cyanidin	118.638	117.701	110.186	1.15493	1.20187	1.39435	0.424906	0.598016	0.525896
5	Anthocyanidin_17	Cyanidin-3-O-sambubioside-5-O-glucoside	743.203	5.67	Cyanidin	0.376538	0.364916	0.361276	0.18146	0.197616	0.190927	3.01756	3.16071	3.01992
6	Anthocyanidin_16	Cyanidin-3-O-xyloside	419.098	9.69	Cyanidin	2.80071	3.06244	2.5981	0.00758013	0.00957878	0.00829413	0.0620091	0.0780556	0.0709163
7	Anthocyanidin_06	Cyanidin-3-O-(6-O-p-coumaroyl)-glucoside	595.145	12.66	Cyanidin	11.7924	11.5897	10.8541	0.0332608	0.0356447	0.0378731	0.0321887	0.0343452	0.0314741
8	Anthocyanidin_08	Cyanidin-3-O-arabinoside	419.098	7.91	Cyanidin	0.270544	0.279683	0.257432	0.0156094	0.019551	0.0176478	0.0193211	0.0174683	0.0192211	＜1ug/g
9	Anthocyanidin_04	Cyanidin-3,5-O-diglucoside	611.161	5.45	Cyanidin	5863.44	5861.25	5630.2	2993.67	2998.21	3014.43	4971.38	5003.97	5011.95
10	Anthocyanidin_11	Cyanidin-3-O-glucoside	449.108	7.48	Cyanidin	283.247	272.944	263.377	35.8132	39.4794	40.4428	61.8117	68.2937	59.4622
11	Anthocyanidin_14	Cyanidin-3-O-sambubioside	581.151	7.59	Cyanidin	0.245732	0.217245	0.199168	0.010186	0.0100536	0.0137695	0.0375567	0.0375397	0.0317928	＜1ug/g
12	Anthocyanidin_15	Cyanidin-3-O-sophoroside	611.161	6.91	Cyanidin	226.677	228.543	219.58	13.7752	13.9678	14.0818	33.5702	34.2857	33.3466
13	Anthocyanidin_20	Delphinidin-3-O-(6-O-acetyl)-glucoside	507.114	11.13	Delphinidin	0.0311433	0.0377403	0.0274871	0.00511278	0.00552553	0.00461158	0.00963292	0.00924008	0.00718526	＜1ug/g
14	Anthocyanidin_23	Delphinidin-3-O-(6-O-p-coumaroyl)-glucoside	611.14	11.75	Delphinidin	0.0740572	0.0760357	0.0567182	0.0871983	0.076058	0.0730579	0.128715	0.132897	0.143625	＜1ug/g
15	Anthocyanidin_32	Delphinidin-3-O-rutinoside-5-O-glucoside	773.214	7.22	Delphinidin	0.0218341	0.0202973	0.0205509	0.0112406	0.0112796	0.00946234	0.0178863	0.0178373	0.0171753	＜1ug/g
16	Anthocyanidin_19	Delphinidin-3,5-O-diglucoside	627.156	4.41	Delphinidin	5.94085	5.96432	5.84027	8.83854	8.73237	8.98399	23.5642	25.0198	23.8247
17	Anthocyanidin_66	Pelargonidin-3-O-arabinoside	403.103	8.78	Pelargonidin	0.0299325	0.0305649	0.0289338	N/A	N/A	N/A	N/A	N/A	N/A	＜1ug/g
18	Anthocyanidin_61	Pelargonidin-3-O-(6-O-malonyl-beta-D-glucoside)	519.114	11.08	Pelargonidin	0.227471	0.218038	0.20868	N/A	N/A	N/A	N/A	N/A	N/A	＜1ug/g
19	Anthocyanidin_72	Pelargonidin-3-O-sophoroside	595.166	7.69	Pelargonidin	16.3815	16.5669	15.547	0.50831	0.531095	0.578178	2.17091	2.19048	2.12151
20	Anthocyanidin_56	Pelargonidin	271.061	9.11	Pelargonidin	0.022231	0.0204559	0.0222354	0.0860309	0.0985297	0.101008	0.215709	0.237103	0.221514	＜1ug/g
21	Anthocyanidin_68	Pelargonidin-3-O-glucoside	433.113	8.42	Pelargonidin	17.2291	17.3399	16.4883	0.470518	0.512021	0.570666	1.3284	1.41925	1.33606
22	Anthocyanidin_59	Pelargonidin-3,5-O-diglucoside	595.166	6.28	Pelargonidin	82.1159	82.0218	77.7646	24.1393	24.7367	25.1433	59.5816	60.8929	60.5976
23	Anthocyanidin_69	Pelargonidin-3-O-rutinoside	579.171	9.11	Pelargonidin	7.90393	8.07334	7.97463	0.0713296	0.0690046	0.0830006	N/A	N/A	N/A
24	Anthocyanidin_78	Peonidin-3,5-O-diglucoside	625.177	6.78	Peonidin	1722.11	1708.62	1655.17	3246.93	3214.78	3218.03	4075.39	4144.84	4398.41
25	Anthocyanidin_86	Peonidin-3-O-glucoside	463.124	9.03	Peonidin	9.90869	9.778	9.74237	31.0645	31.1544	31.2512	31.2216	32.9365	32.9482
26	Anthocyanidin_89	Peonidin-3-O-sambubioside	595.166	9.13	Peonidin	0.0526002	0.049217	0.0544392	0.284527	0.271011	0.312512	1.26643	1.19901	1.06793
27	Anthocyanidin_80	Peonidin-3-O-(6-O-p-coumaroyl)-glucoside	609.161	12.68	Peonidin	0.45395	0.429534	0.424891	0.238227	0.23326	0.254793	0.401224	0.35754	0.349203	＜1ug/g
28	Anthocyanidin_82	Peonidin-3-O-arabinoside	433.113	9.43	Peonidin	0.000386463	0.000338157	0.00025763	0.0417095	0.0454798	0.04746	0.0675745	0.0728175	0.0694622	＜1ug/g
29	Anthocyanidin_77	Peonidin-3-sophoroside-5-glucoside	787.23	6.24	Peonidin	0.0104903	0.0122002	0.00957987	0.167827	0.151997	0.174007	0.330768	0.384127	0.369124	＜1ug/g
30	Anthocyanidin_88	Peonidin-3-O-rutinoside	609.182	9.49	Peonidin	6.30806	6.10902	5.46175	1.4719	1.5154	1.69559	3.27807	3.7004	3.55976
31	Anthocyanidin_90	Peonidin-3-O-sophoroside	625.177	8.75	Peonidin	7.8424	8.05946	7.20769	13.7812	13.5744	16.4776	49.0823	42.1429	43.2072
32	Anthocyanidin_79	Peonidin-3-O-(6-O-malonyl-beta-D-glucoside)	549.124	11.36	Peonidin	0.0104268	0.00857483	0.00882283	N/A	N/A	N/A	N/A	N/A	N/A	＜1ug/g
33	Anthocyanidin_98	Petunidin-3-O-glucoside	479.119	8.11	Petunidin	0.00260024	0.0025114	0.00266548	0.00780372	0.00739718	0.00777822	0.00701007	0.00877976	0.00979482	＜1ug/g
34	Anthocyanidin_101	Petunidin-3-O-sophoroside	641.172	7.89	Petunidin	0.741564	0.725471	0.684503	0.550455	0.584343	0.6102	0.743833	0.853175	0.795219	＜1ug/g
35	Anthocyanidin_92	Petunidin-3,5-O-diglucoside	641.172	6.75	Petunidin	0.216753	0.221606	0.221562	0.450336	0.454997	0.434869	0.608447	0.638492	0.626494	＜1ug/g
36	Anthocyanidin_97	Petunidin-3-O-galactoside	479.119	8.15	Petunidin	0.0807662	0.0842418	0.0794689	0.104769	0.106815	0.10846	0.0958555	0.094246	0.0913944	＜1ug/g
37	Anthocyanidin_93	Petunidin-3-O-(6-O-malonyl-beta-D-glucoside)	565.119	10.94	Petunidin	0.0715165	0.0730426	0.0645264	1.67966	1.59785	1.65784	1.41267	1.63393	1.48247
38	Anthocyanidin_106	Procyanidin B2	578.142	5.58	Procyanidin	0.839023	0.79663	0.864249	0.228928	0.236439	0.232655	0.20525	0.213889	0.221315	＜1ug/g
39	Anthocyanidin_105	Procyanidin B1	578.142	3.82	Procyanidin	44.8392	44.0238	40.5866	0.800356	0.841844	0.866574	0.353464	0.335317	0.362749
40	Anthocyanidin_103	Procyanidin A1	576.127	7.21	Procyanidin	0.367606	0.333994	0.315497	0.0365849	0.0351679	0.0347302	0.101559	0.11371	0.118008	＜1ug/g
41	Anthocyanidin_107	Procyanidin B3	578.142	3.45	Procyanidin	98.7495	96.2735	87.9112	10.0237	10.7133	11.2572	4.62009	4.38095	4.36255
42	Anthocyanidin_34	Afzelin	432.106	12.9	flavonoid	6.77848	6.54708	6.25644	N/A	N/A	N/A	0.268009	0.225198	0.221514
43	Anthocyanidin_42	Rutin	610.153	11.35	flavonoid	7.37197	7.12587	6.36346	0.426791	0.49235	0.395533	0.271758	0.259127	0.270319
44	Anthocyanidin_41	Quercetin-3-O-glucoside	464.095	11.34	flavonoid	15.4307	13.9366	12.5446	1.30194	1.2277	1.37577	8.31656	10.1448	10.6972
45	Anthocyanidin_40	Naringenin-7-O-glucoside	434.121	11.44	flavonoid	10.9587	9.99405	9.88109	8.13019	8.67077	7.7031	14.0359	14.7877	14.9542
46	Anthocyanidin_39	Naringenin	272.068	13.09	flavonoid	0.101667	0.1045	0.10113	0.0036941	0.00281741	0.00362918	0.00430432	0.00468056	0.00537849	＜1ug/g
47	Anthocyanidin_38	Kaempferol-3-O-rutinoside	594.158	12.49	flavonoid	21.2386	20.6145	19.2509	0.277206	0.288297	0.304606	0.174403	0.173075	0.135777
48	Anthocyanidin_36	Dihydrokaempferol	288.063	10.83	flavonoid	0.0348154	0.0286819	0.0374554	N/A	N/A	N/A	N/A	N/A	N/A	＜1ug/g
